# Supplementary material
Source: ML conference proceedings conference paper supplement (https://openaccess.thecvf.com/content/CVPR_2020/html/B.S._Single-Step_Adversarial_Training_CVPR_2020_paper.html)
Supplement: Supplementary file 1 [file B.S._Single-Step_Adversarial_Training_CVPR_2020_supplemental.pdf]

# Supplementary: Single-step Adversarial training with Dropout Scheduling

Vivek B.S. and R. Venkatesh Babu

Video Analytics Lab, Department of Computational and Data Sciences  
Indian Institute of Science, Bangalore, India

## Contents

- Section 1: Network architecture.
- Section 2: Adversarial training and Attack generation methods.
- Section 3: Additional plots to illustrate over-fitting effect during single-step adversarial training.
- Section 4: Effect of hyper-parameters
- Section 5: Comparison with EAT
- Section 6: Trend of  $R_\epsilon$ , training and validation loss during SADS.

## 1. Network Architecture

Network architecture of models used for MNIST and Fashion-MNIST datasets are shown in Table 1. Model-A and Model-B are used for generating adversarial samples in black-box setting.

## 2. Adversarial training and Attack generation methods

### 2.1. Adversarial Sample Generation Methods

In this subsection, we discuss the formulation of adversarial attacks.

**Fast Gradient Sign Method (FGSM):** Non-iterative attack method proposed by [2]. This method generates  $l_\infty$  norm

bounded adversarial perturbation based on the linear approximation of loss function.

$$x^* = x + \epsilon \cdot \text{sign}(\nabla_x J(f(x; \theta), y_{true})) \quad (1)$$

**Iterative Fast Gradient Sign Method (IFGSM) [4]:** Iterative version of FGSM attack. At each iteration, adversarial perturbation of small step size ( $\alpha$ ) is added to the image. In our experiments, we set  $\alpha = \epsilon / \text{steps}$ .

$$\begin{aligned} x^0 &= x \\ x^{N+1} &= x^N + \alpha \cdot \text{sign}(\nabla_{x^N} J(f(x^N; \theta), y_{true})) \end{aligned} \quad (2)$$

**Projected Gradient Descent (PGD) [5]:** Initially, a small random noise sampled from Uniform distribution ( $U$ ) is added to the image. Then at each iteration, perturbation of small step size ( $\epsilon_{step}$ ) is added to the image, and followed by re-projection.

$$\begin{aligned} x^0 &= x + U(-\epsilon_{step}, \epsilon_{step}, \text{shape}(x)) \\ x^{N+1} &= x^N + \epsilon_{step} \cdot \text{sign}(\nabla_{x^N} J(f(x^N; \theta), y_{true})) \\ x^{N+1} &= \text{clip}(x^{N+1}, \text{min} = x - \epsilon, \text{max} = x + \epsilon) \end{aligned} \quad (4)$$

**Momentum Iterative Fast Gradient Sign Method (MI-FGSM) [1]:** Introduces a momentum term into the IFGSM formulation. Here,  $\mu$  represents the momentum term.  $\alpha$  represents step size and is set to  $\epsilon / \text{steps}$ .

$$\begin{aligned} x^0 &= x \\ g^{N+1} &= \mu \cdot g^N + \frac{\nabla_{x^N} J(f(x^N; \theta), y_{true})}{\|\nabla_{x^N} J(f(x^N; \theta), y_{true})\|_1} \\ x^{N+1} &= x^N + \alpha \cdot \text{sign}(g^{N+1}) \end{aligned} \quad (7)$$

$$x^{N+1} = x^N + \alpha \cdot \text{sign}(g^{N+1}) \quad (9)$$

Table 1: Architecture of networks used for MNIST and Fashion-MNIST datasets.

| LeNet+                              | Model-A                                    | Model-B                                      | Model-C                              | Model-D                                                                                                               |
|-------------------------------------|--------------------------------------------|----------------------------------------------|--------------------------------------|-----------------------------------------------------------------------------------------------------------------------|
| Conv(32,5,5) + Relu<br>MaxPool(2,2) | Conv(64,5,5) + Relu<br>Conv(64,5,5) + Relu | Dropout(0.2)<br>Conv(64,8,8) + Relu          | Conv(128,3,3) + Tanh<br>MaxPool(2,2) | $\left\{ \begin{array}{l} \text{FC(300) + Relu} \\ \text{Dropout(0.5)} \end{array} \right\} \times 4$<br>FC + Softmax |
| Conv(64,5,5) + Relu<br>MaxPool(2,2) | Dropout(0.25)<br>FC(128) + Relu            | Conv(128,6,6) + Relu<br>Conv(128,5,5) + Relu | Conv(64,3,3) + Tanh<br>MaxPool(2,2)  |                                                                                                                       |
| FC(1024) + Relu                     | Dropout(0.5)                               | Dropout(0.5)                                 | FC(128) + Relu                       |                                                                                                                       |
| FC + Softmax                        | FC + Softmax                               | FC + Softmax                                 | FC + Softmax                         |                                                                                                                       |

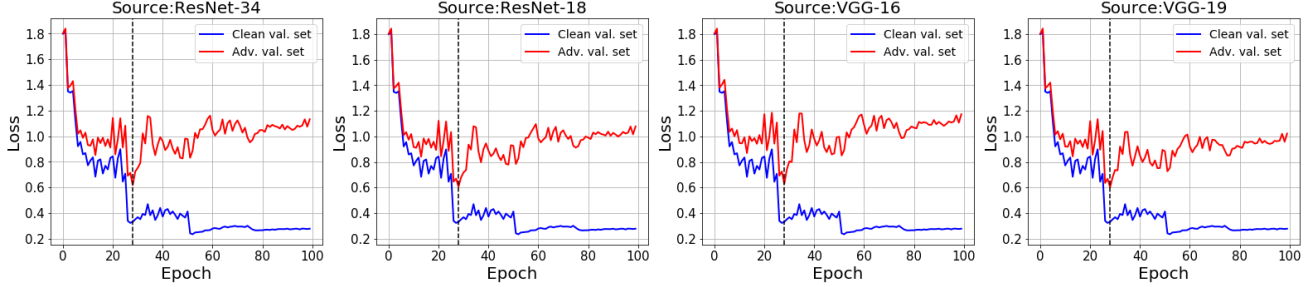

Figure 1: **Single-step adversarial training**: Trend of validation loss during single-step adversarial training, obtained for ResNet-34 trained on CIFAR-10 dataset. Adversarial validation set is generated using column-1: ResNet-34, column-2: ResNet-18, column-3: VGG-16 and column-4: VGG-19.

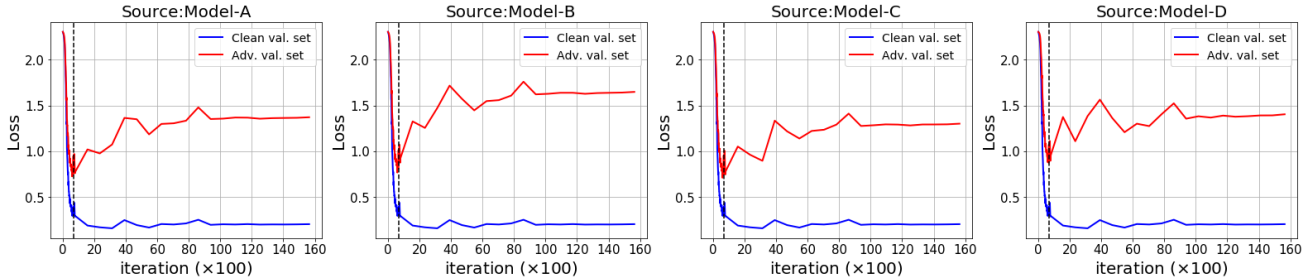

Figure 2: **Single-step adversarial training**: Trend of validation loss during single-step adversarial training, obtained for LeNet+ trained on MNIST dataset. Adversarial validation set is generated using column-1: Model-A, column-2: Model-B, column-3: Model-C and column-4: Model-D.

## 2.2. Adversarial Training Methods

In this subsection we explain the existing adversarial training methods.

**FGSM Adversarial Training (FAT)**: During training, at each iteration a portion of clean samples in the mini-batch are replaced with their corresponding adversarial samples generated using the model being trained. Fast Gradient Sign Method (FGSM) is used for generating these adversarial samples.

**Ensemble Adversarial Training (EAT)** [6]: At each iteration a portion of clean samples in the mini-batch are replaced with their corresponding adversarial samples. These adversarial samples are generated by the model being trained or by one of the model from the fixed set of pre-trained models. Table 2 shows the setup used for EAT method.

**PGD Adversarial Training (PAT)**: Multi-step adversarial training method proposed by [5]. At each iteration all the clean samples in the mini-batch are replaced with their corresponding adversarial samples generated using the model being trained. Projected Gradient Descent (PGD) method is used for generating these samples.

**TRADES**: Multi-step adversarial training method proposed by [8]. The method proposes a regularizer that encourages the output of the network to be smooth. The training mini-batches contain clean and their corresponding adversarial samples. These adversarial samples are generated using Projected Gradient Descent with modified loss function.

## 3. Additional plots to illustrate over-fitting effect

In the main paper, we showed over-fitting effect during training of LeNet+ on MNIST dataset using single-step adversarial training. Fig. 1 shows the plot of validation loss, obtained for ResNet-34 trained on CIFAR-10 dataset using single-step adversarial training. We observe over-fitting effect even when model with different architecture is used for generating adversarial validation set. Fig. 2 shows the validation loss obtained for LeNet+ trained on MNIST dataset using single-step adversarial training. Normally trained models with different architecture are used for generating adversarial validation set.

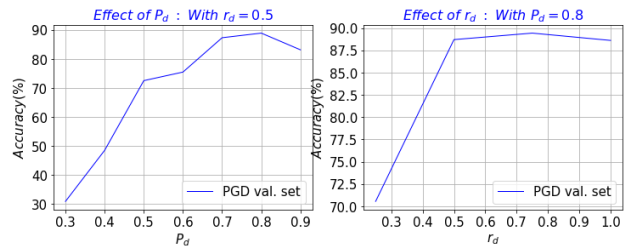

Figure 3: Effect of hyper-parameter  $P_d$  and  $r_d$  of SADS

## 4. Effect of Hyper-Parameters

In order to show the effect of hyper-parameters, we train LeNet+ shown in table 1 on MNIST dataset, using SADS with different hyper-parameter settings. Validation set accuracy of the model for PGD attack ( $\epsilon = 0.3$  and  $steps = 40$ ) is obtained for each hyper-parameter setting with one of them being fixed and the other being varied.

**Effect of hyper-parameter  $P_d$ :** The hyper-parameter  $P_d$  defines the initial dropout probability applied to all dropout layers. We train LeNet+ on MNIST dataset, using the proposed method for different initial dropout probability  $P_d$ . Column-1 of Fig. 3 shows the effect of varying dropout probability from 0.3 to 0.9. It can be observed that the robustness of the model to multi-step attack initially increases with the increase in the value of  $P_d$  ( $P_d < 0.8$ ), and further increase in  $P_d$  causes the model’s robustness to decrease, and this is due to under-fitting.

**Effect of hyper-parameter  $r_d$ :** The hyper-parameter  $r_d$  decides the iteration at which dropout probability reaches zero and is expressed in terms of maximum training iteration. Column-2 of Fig. 3 shows the effect varying  $r_d$  from 1/4 to 1. It can be observed that for  $r_d < 0.5$ , there is degradation in the robustness of the model against multi-step attacks. This is because, during the initial stages of training, learning rate is high and the model can easily over-fit to adversaries generated by single-step method.

## 5. Comparison with Ensemble Adversarial Training

We train WideResNet-28-10 [7] on CIFAR-10 [3] dataset using EAT and SADS. Table 2 shows the setup used for EAT. Pre-trained models are used for generating adversarial samples during EAT. Table 3 shows the recognition accuracy of models trained using EAT and SADS in white-box attack setting. It can be observed that the model trained using SADS is robust to both single-step (FGSM) and multi-step attacks (PGD), whereas models trained using EAT are susceptible to multi-step attack.

Table 2: Setup used for Ensemble Adversarial Training.

|          | Network to be trained | Pre-trained Models   |
|----------|-----------------------|----------------------|
| CIFAR-10 | WRN-28-10 (Ens-A)     | WRN-28-10, ResNet-34 |
|          | WRN-28-10 (Ens-B)     | WRN-28-10, VGG-19    |
|          | WRN-28-10 (Ens-C)     | ResNet-34, VGG-19    |

## 6. SADS: Trend of $R_\epsilon$ , training and validation loss

Fig. 4 and 5 show the trend of  $R_\epsilon$ , training and validation loss, obtained for models trained using SADS. It can

Table 3: **CIFAR-10: White-Box attack.** Classification accuracy (%) of models trained on CIFAR-10 dataset using different training methods. For all attacks  $\epsilon=8/255$  is used and for PGD attack  $\epsilon_{step}=2/255$  and  $steps=7$  is used.

| Training Method | Attack Method       |                     |                     |
|-----------------|---------------------|---------------------|---------------------|
|                 | Clean               | FGSM                | PGD-7               |
| EAT Ens-A       | 92.92               | 59.56               | 19.21               |
| EAT Ens-B       | 92.75               | 63.40               | 5.34                |
| EAT Ens-C       | 93.11               | 59.74               | 12.03               |
| SADS            | 82.01<br>$\pm 0.06$ | 51.99<br>$\pm 1.02$ | 45.66<br>$\pm 1.26$ |

be observed that for the entire training duration  $R_\epsilon$  does not decay and no over-fitting effect can be observed.

## References

- [1] Yinpeng Dong, Fangzhou Liao, Tianyu Pang, Hang Su, Jun Zhu, Xiaolin Hu, and Jianguo Li. Boosting adversarial attacks with momentum. In *Proceedings of the IEEE Conference on Computer Vision and Pattern Recognition*, pages 9185–9193, 2018. 1
- [2] Ian J. Goodfellow, Jonathon Shlens, and Christian Szegedy. Explaining and harnessing adversarial examples. In *International Conference on Learning Representations (ICLR)*, 2015. 1
- [3] Alex Krizhevsky, Vinod Nair, and Geoffrey Hinton. Cifar-10 (canadian institute for advanced research). 3
- [4] Alexey Kurakin, Ian Goodfellow, and Samy Bengio. Adversarial examples in the physical world. *arXiv preprint arXiv:1607.02533*, 2016. 1
- [5] Aleksander Madry, Aleksandar Makelov, Ludwig Schmidt, Tsipras Dimitris, and Adrian Vladu. Towards deep learning models resistant to adversarial attacks. In *International Conference on Learning Representations (ICLR)*, 2018. 1, 2
- [6] Florian Tramèr, Alexey Kurakin, Nicolas Papernot, Dan Boneh, and Patrick McDaniel. Ensemble adversarial training: Attacks and defenses. In *International Conference on Learning Representations (ICLR)*, 2018. 2
- [7] Sergey Zagoruyko and Nikos Komodakis. Wide residual networks. In Edwin R. Hancock Richard C. Wilson and William A. P. Smith, editors, *Proceedings of the British Machine Vision Conference (BMVC)*, pages 87.1–87.12. BMVA Press, September 2016. 3
- [8] Hongyang Zhang, Yaodong Yu, Jiantao Jiao, Eric Xing, Laurent El Ghaoui, and Michael Jordan. Theoretically principled trade-off between robustness and accuracy. In *International Conference on Machine Learning*, pages 7472–7482, 2019. 2

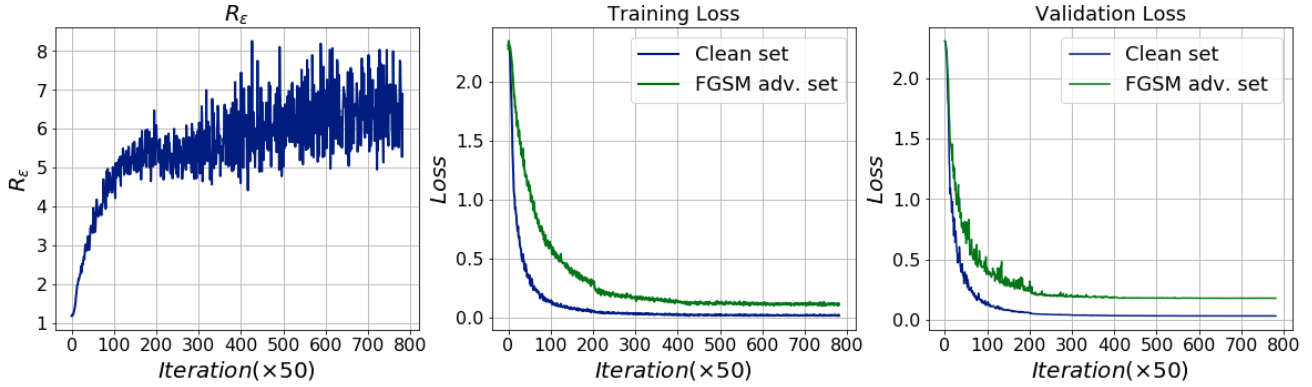

Figure 4: **MNIST**: Trend of  $R_\epsilon$ , training loss, and validation loss during SADS training method, obtained for LeNet+ trained on MNIST dataset. Column-1: plot of  $R_\epsilon$  versus iteration. Column-2: training loss versus iteration. Column-3: validation loss versus iteration. Note that, for the entire training duration  $R_\epsilon$  does not decay, and no over-fitting effect can be observed.

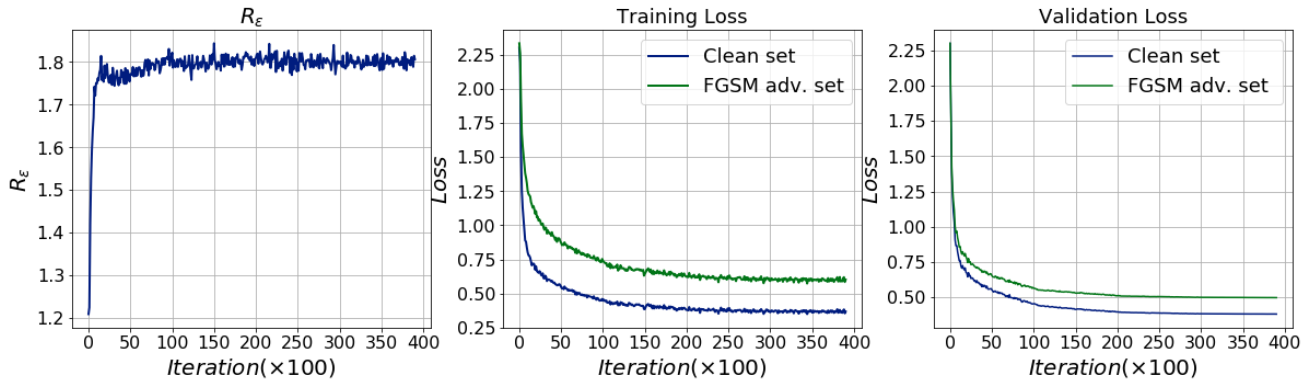

Figure 5: **Fashion-MNIST**: Trend of  $R_\epsilon$ , training loss, and validation loss during SADS training method, obtained for LeNet+ trained on Fashion-MNIST dataset. Column-1: plot of  $R_\epsilon$  versus iteration. Column-2: training loss versus iteration. Column-3: validation loss versus iteration. Note that, for the entire training duration  $R_\epsilon$  does not decay, and no over-fitting effect can be observed.
